# Supplementary material for: Photocatalytic degradation of paraquat dichloride over CeO2-modified TiO2 nanotubes and the optimization of parameters by response surface methodology
Source: Royal Society of Chemistry journal article supplement (doi:10.1039/c6ra24283a), 2016-01-01

## **Electronic Supplementary Data (ESI)**

### **Photocatalytic degradation of paraquat dichloride over CeO<sub>2</sub>-modified TiO<sub>2</sub> nanotubes and the optimization of parameters by response surface methodology.**

Naimat Abimbola Eleburuike<sup>a</sup>, Wan Azelee Wan Abu Bakar<sup>a\*</sup> Rusmidah Ali<sup>a</sup> and Muhammad Firdaus Omar<sup>b</sup>

Department of Chemistry, Faculty of Science, Universiti Teknologi Malaysia, 81310 UTM Skudai, Johor, Malaysia.

Table S1 The independent variables with their coded factors and levels

| Independent Variable         | Coded Factor   | Levels and Range |     |     |
|------------------------------|----------------|------------------|-----|-----|
|                              |                | -1               | 0   | 1   |
| Calcination temperature (°C) | X <sub>1</sub> | 600              | 700 | 800 |
| Catalyst loading (g)         | X <sub>2</sub> | 0.2              | 0.3 | 0.4 |
| CeO <sub>2</sub> ratio       | X <sub>3</sub> | 5                | 10  | 15  |

Table S2 XRD Crystallite size of catalysts

| Catalyst       | Crystallite Size (nm) |
|----------------|-----------------------|
| TNP 500 °C     | 23.51                 |
| TNT 500 °C     | 27.43                 |
| Ce-TNTs 500 °C | 20.58                 |
| TNTs 760 °C    | 40.51                 |
| Ce-TNTs 760 °C | 32.91                 |

**Fig. S1** Nitrogen adsorption-desorption isotherms and the pore size distribution of catalysts.

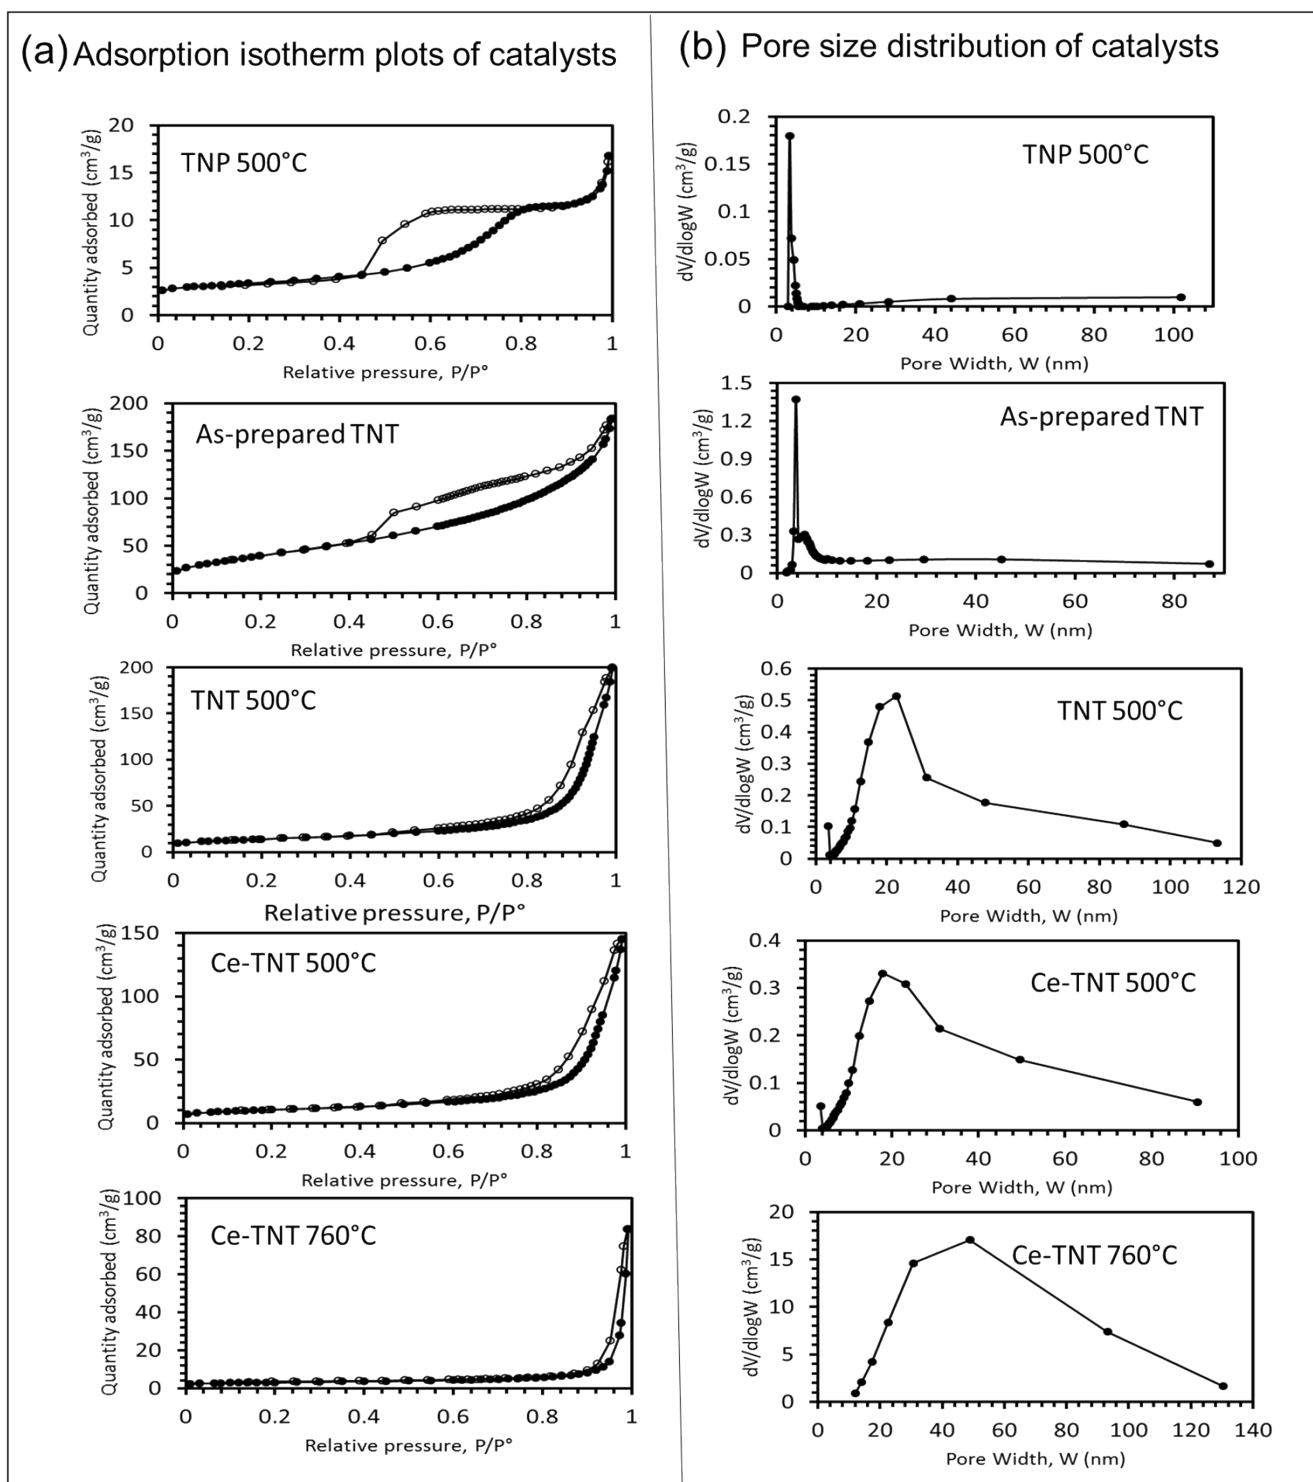

**Fig. S2** The profile of FFT of CeO<sub>2</sub> showing the measured lattice spacing

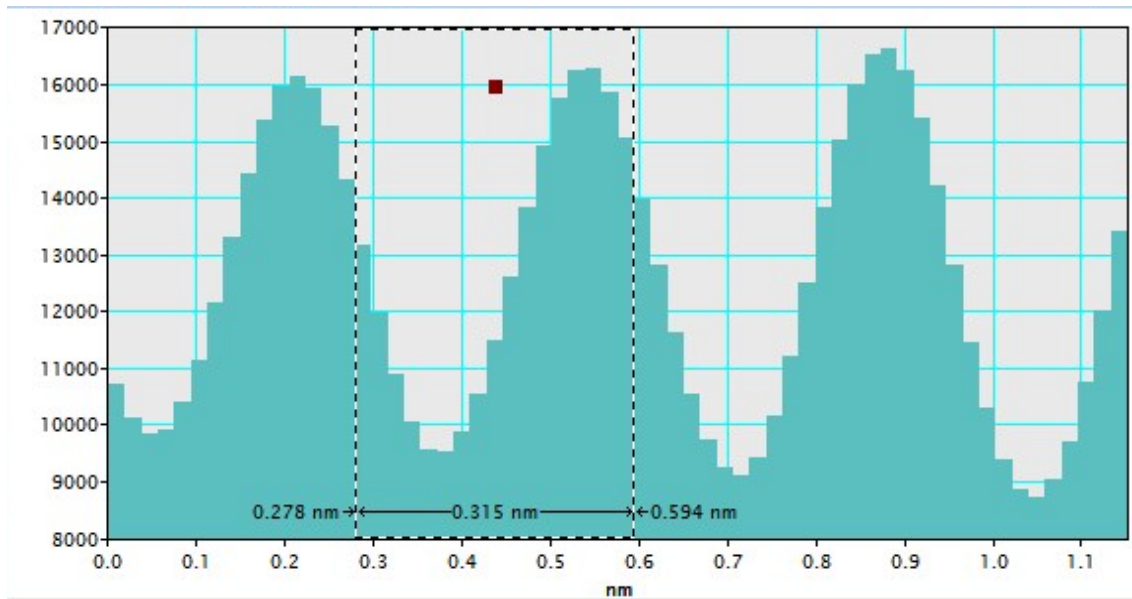

**Fig. S3** EDX spectra of Ce-TNTs calcined at 500 °C

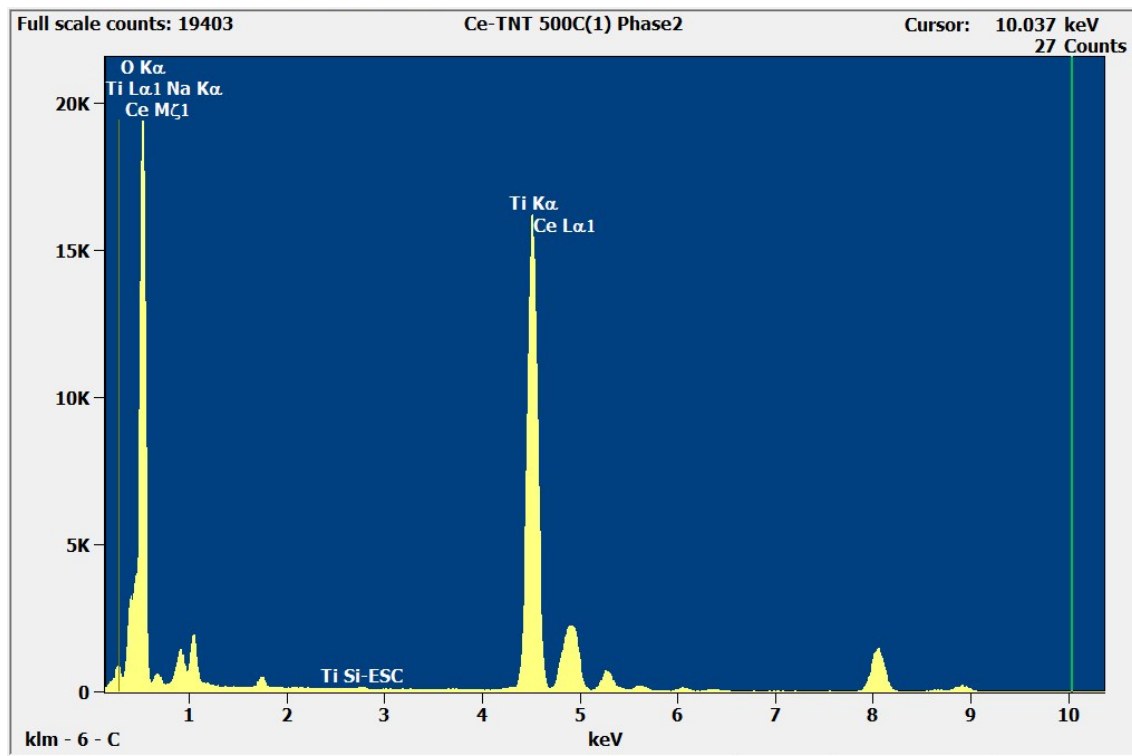

**Fig. S4** EDX spectra of Ce-TNTs calcined at 760 °C

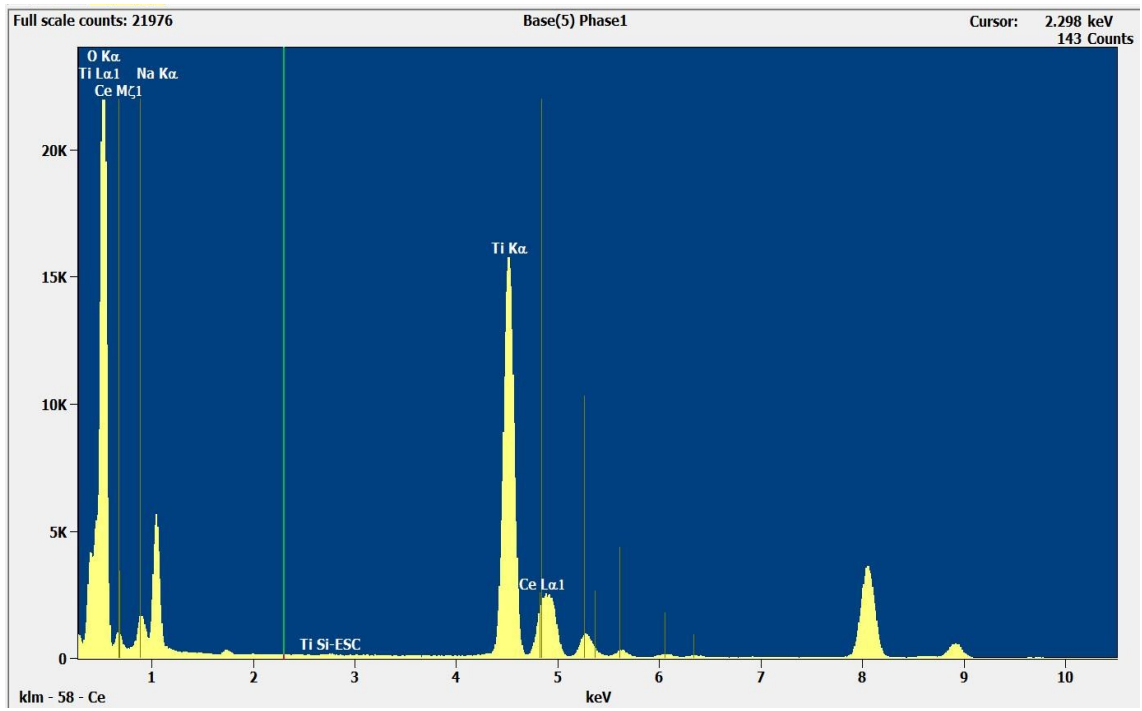

**Fig. S5 (a)** The FFT of STEM of Ce-TNTs

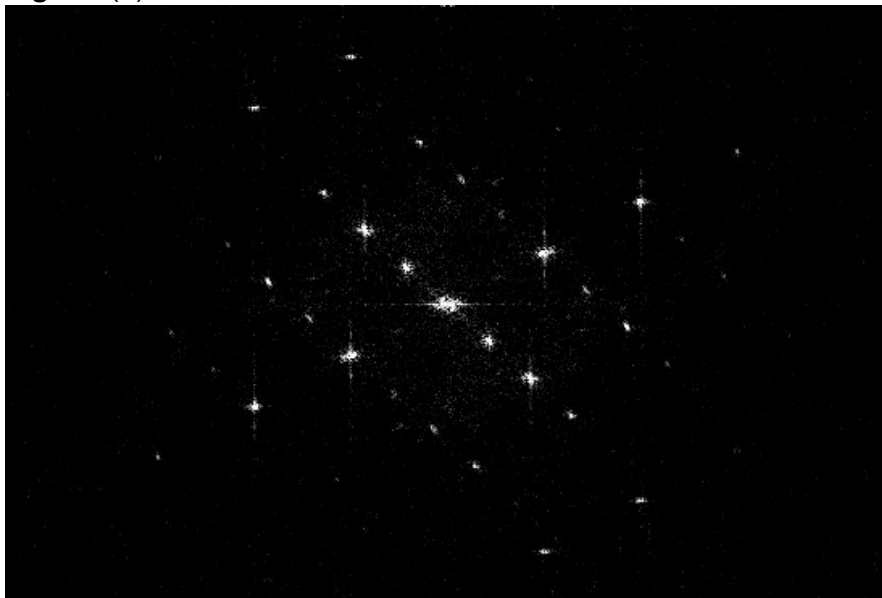

**Fig. S5 (b)** The profile of TNTs part in STEM of Ce-TNTs

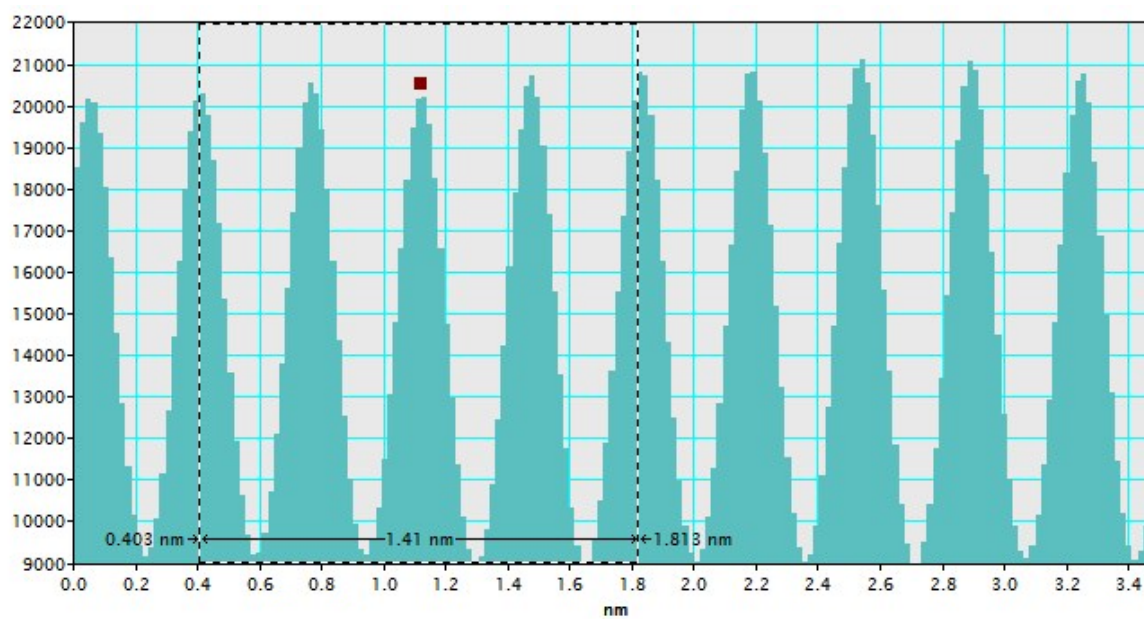

**Fig. S6** EELS Spectra of TNTs calcined at 500 and 700 °C used as reference

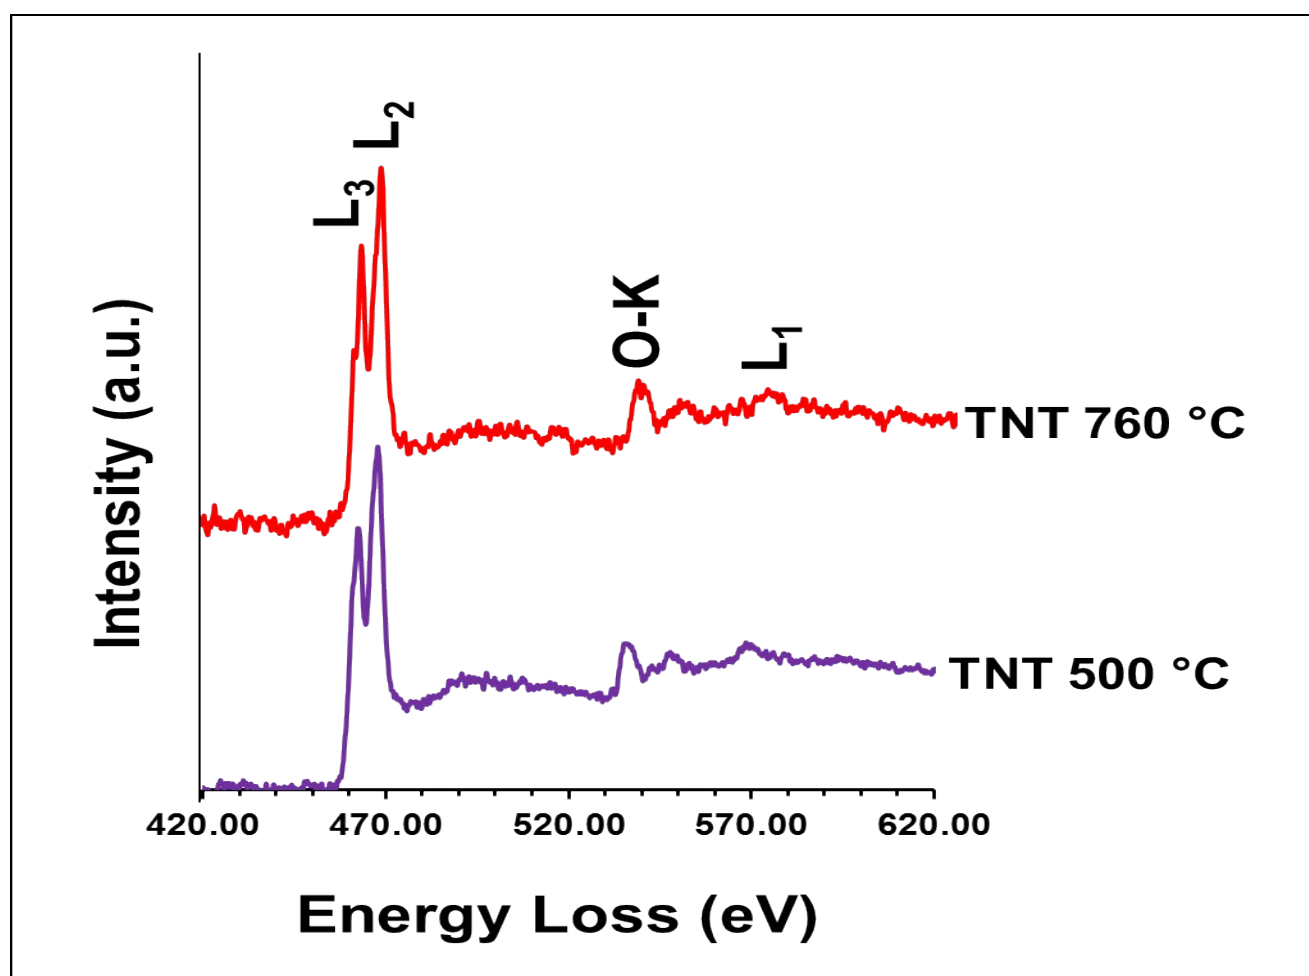

Fig. S7 EELS Spectra of CeO<sub>2</sub> calcined at 500 and 700 °C used as reference

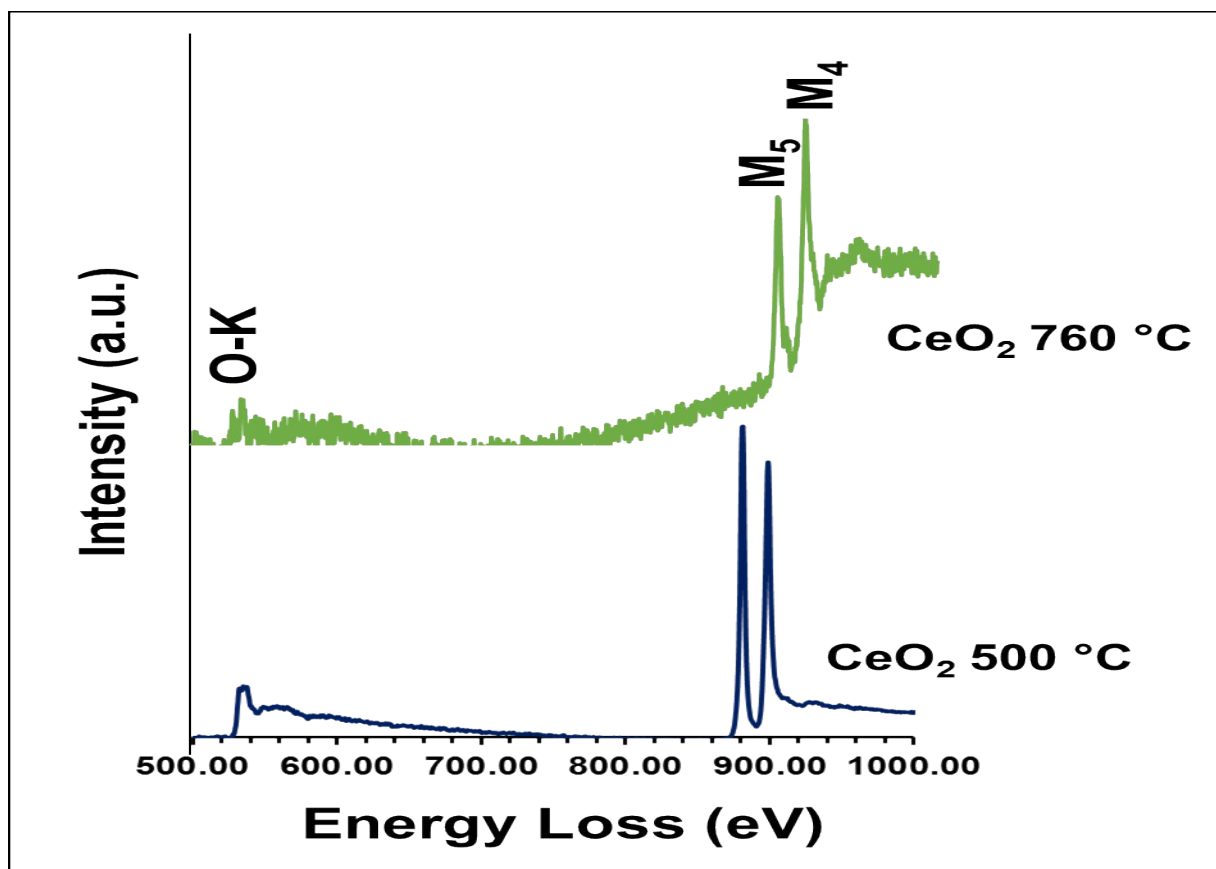

**Fig. S8** A plot of the different type of residuals considered in evaluating the fitness of the quadratic model for predicting the optimum response.

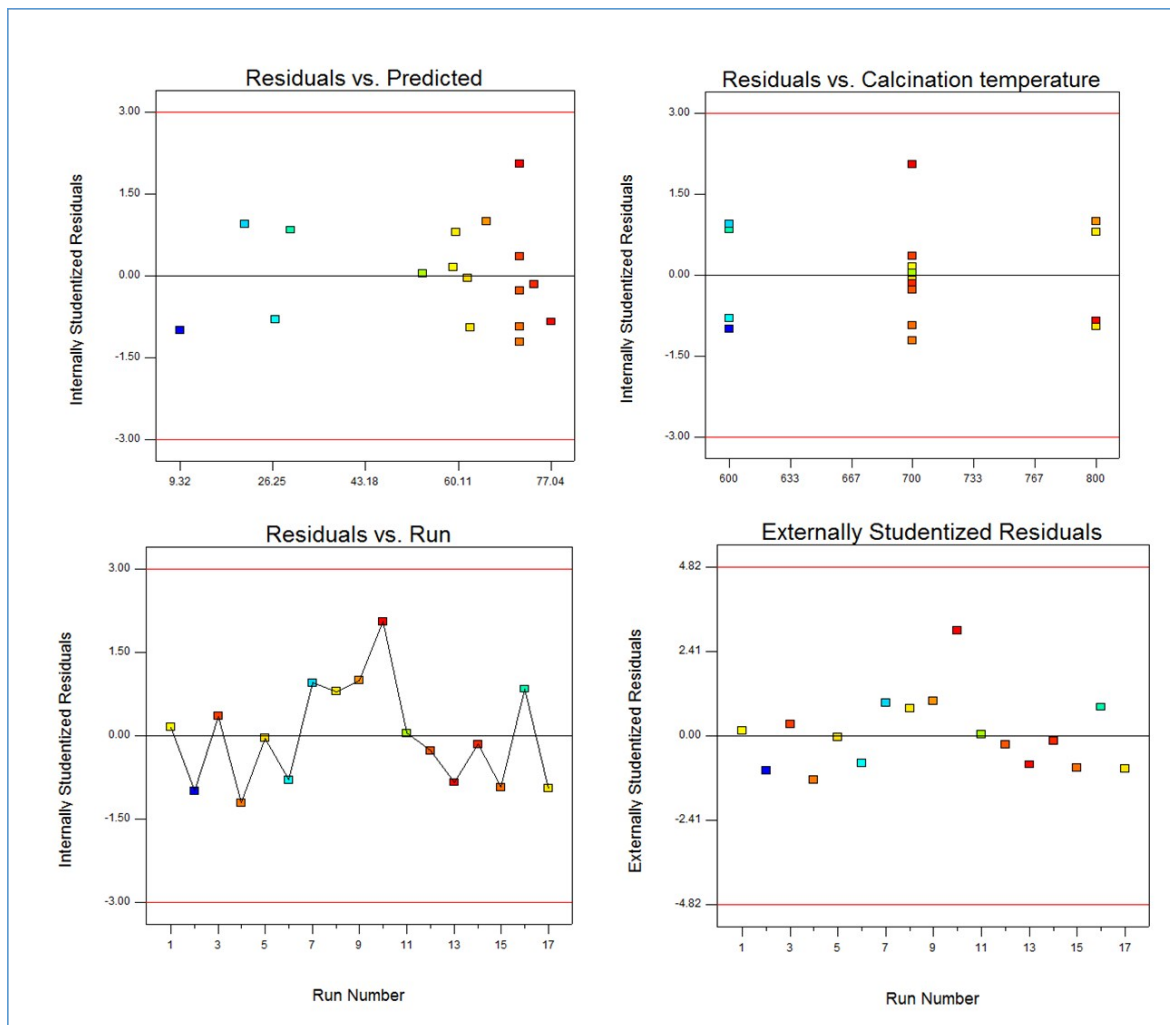

**Fig. S9** Contour plots of the interactions between calcination temperature and catalyst loading at a fixed CeO<sub>2</sub> ratio of 10 %.

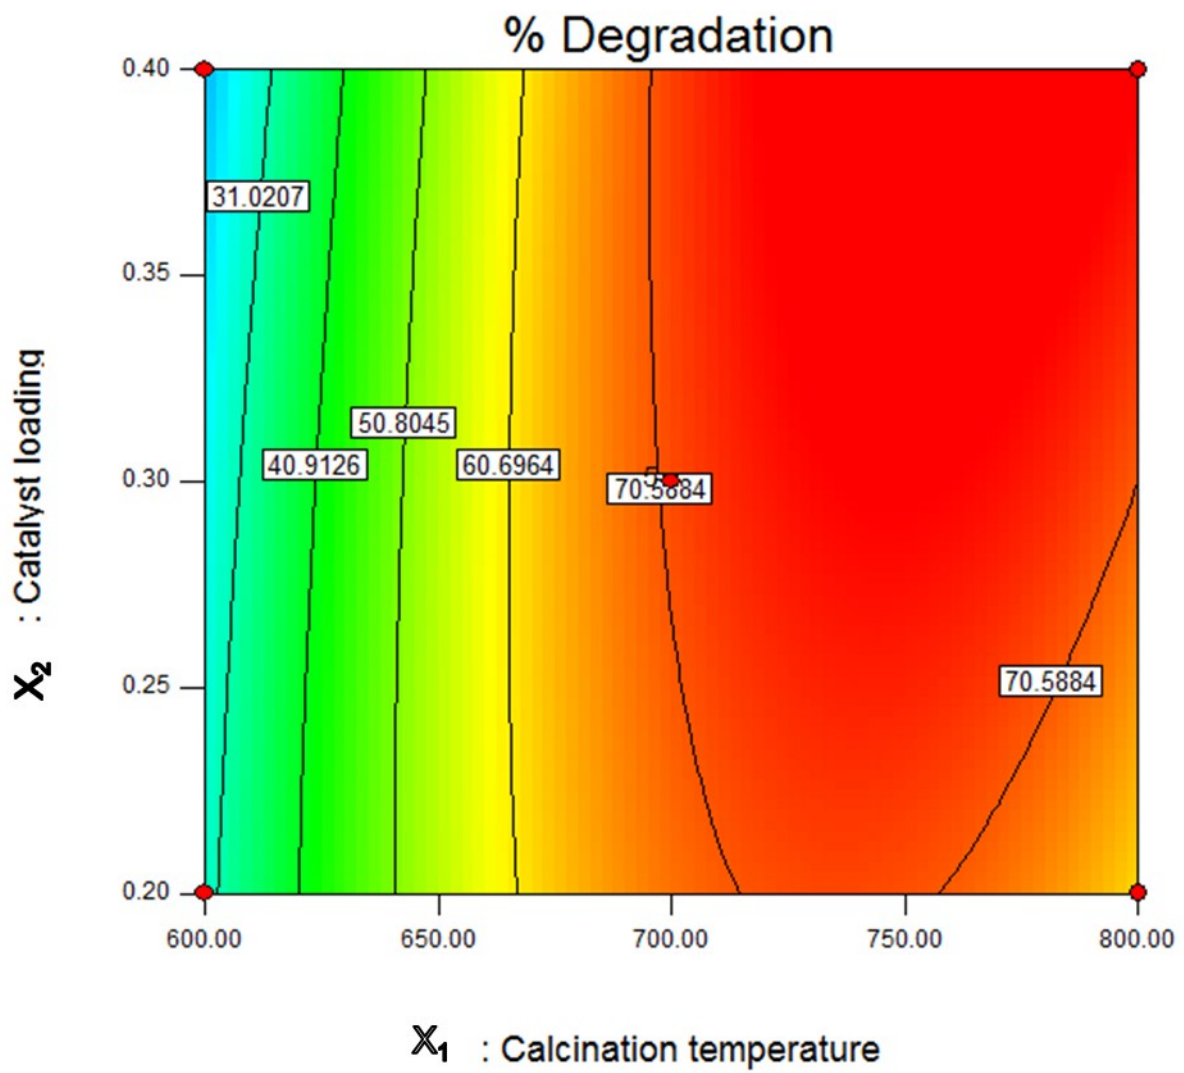



**Fig. S10** Contour plots of the interactions between calcination temperature and CeO<sub>2</sub> ratio at a fixed catalyst loading of 0.3 g.

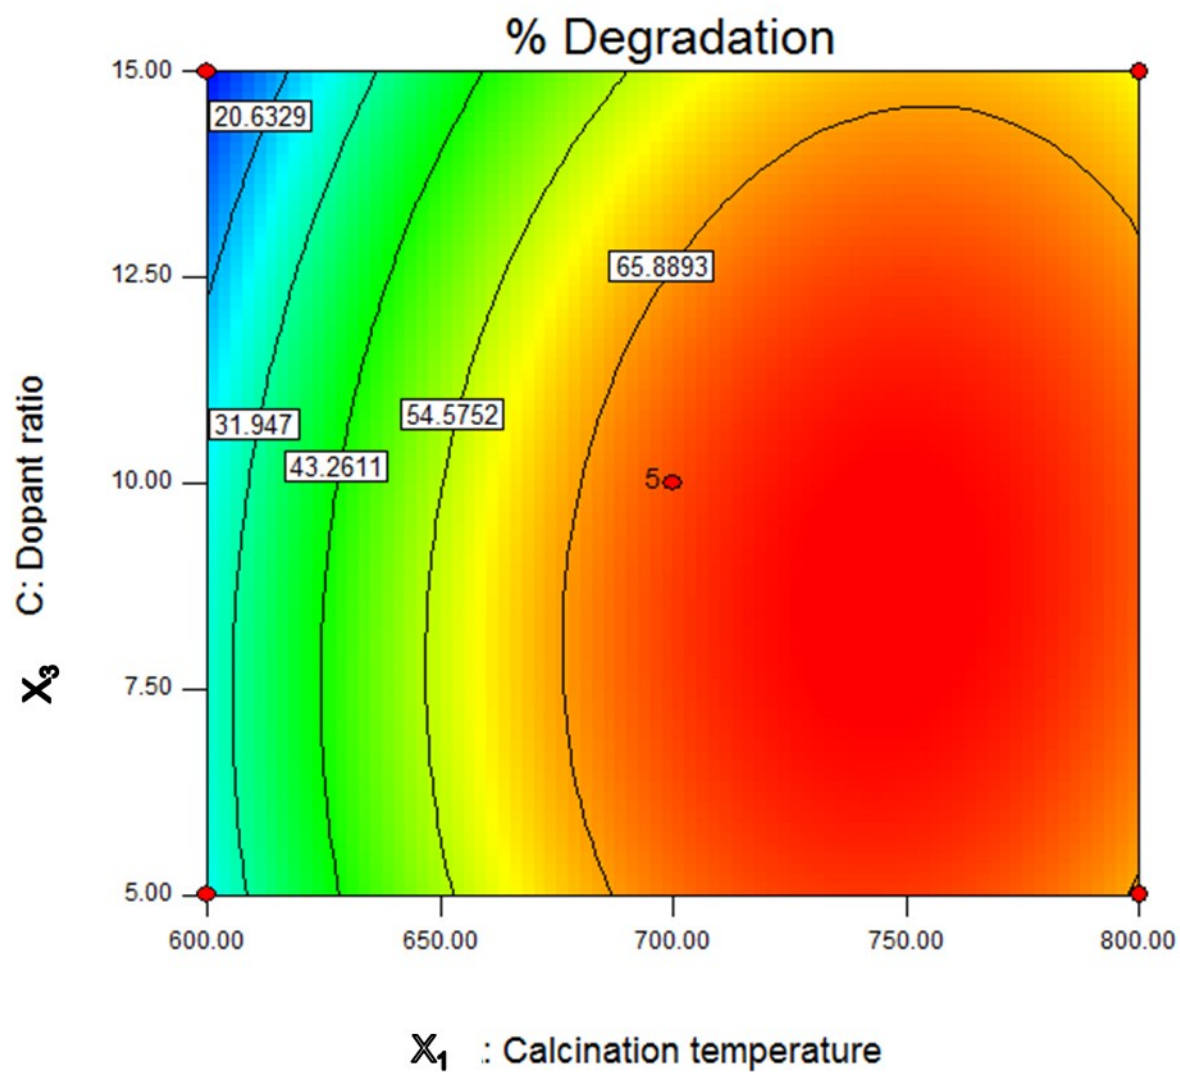

**Fig. S11** Contour plots of interactions between catalyst loading and CeO<sub>2</sub> ratio at a fixed calcination temperature of 700 °C.

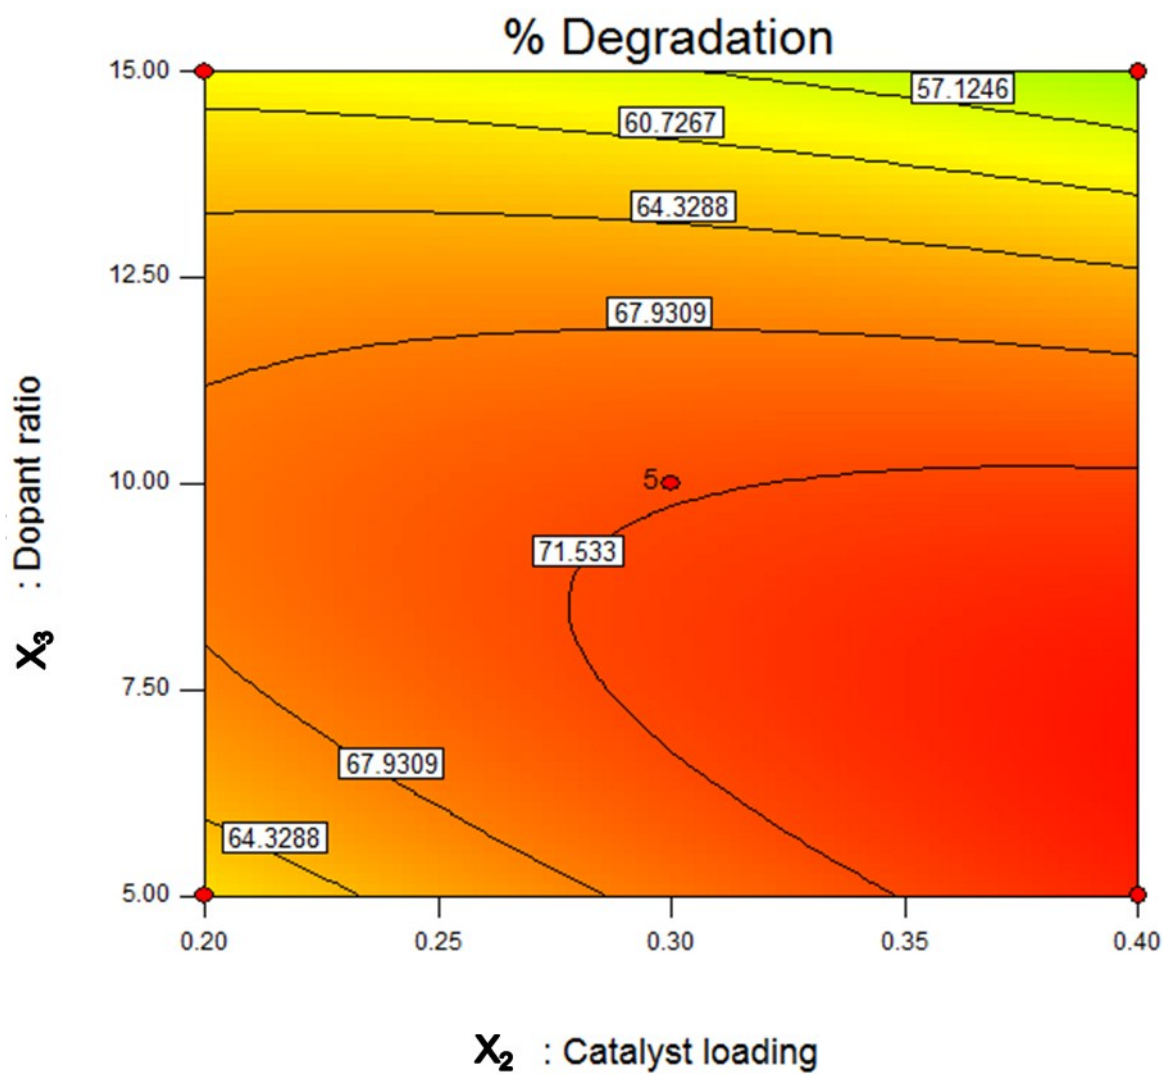

**Fig. S12** Rate of degradation of PQ with time under the optimized conditions

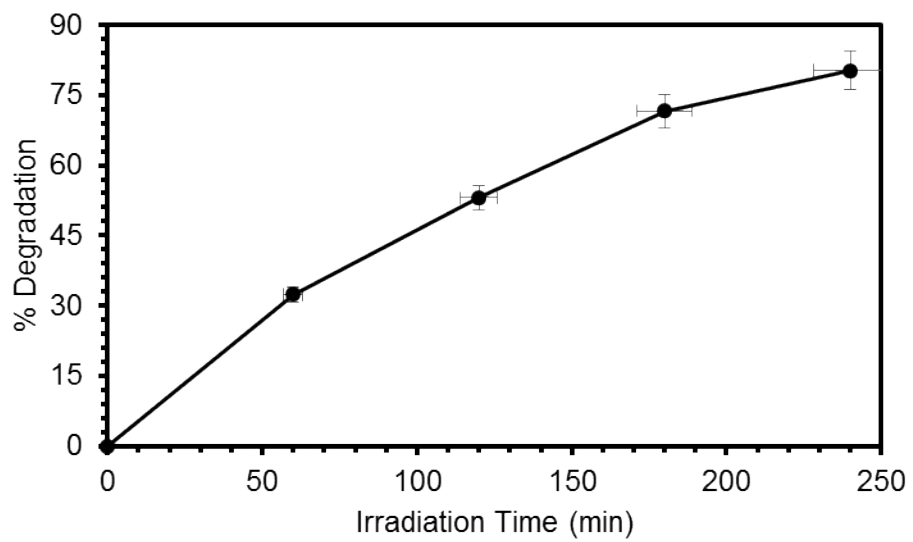

### Clear TEM Micrographs

TEM Image of Ce-TNTs, 500 °C shown in Figure 2a

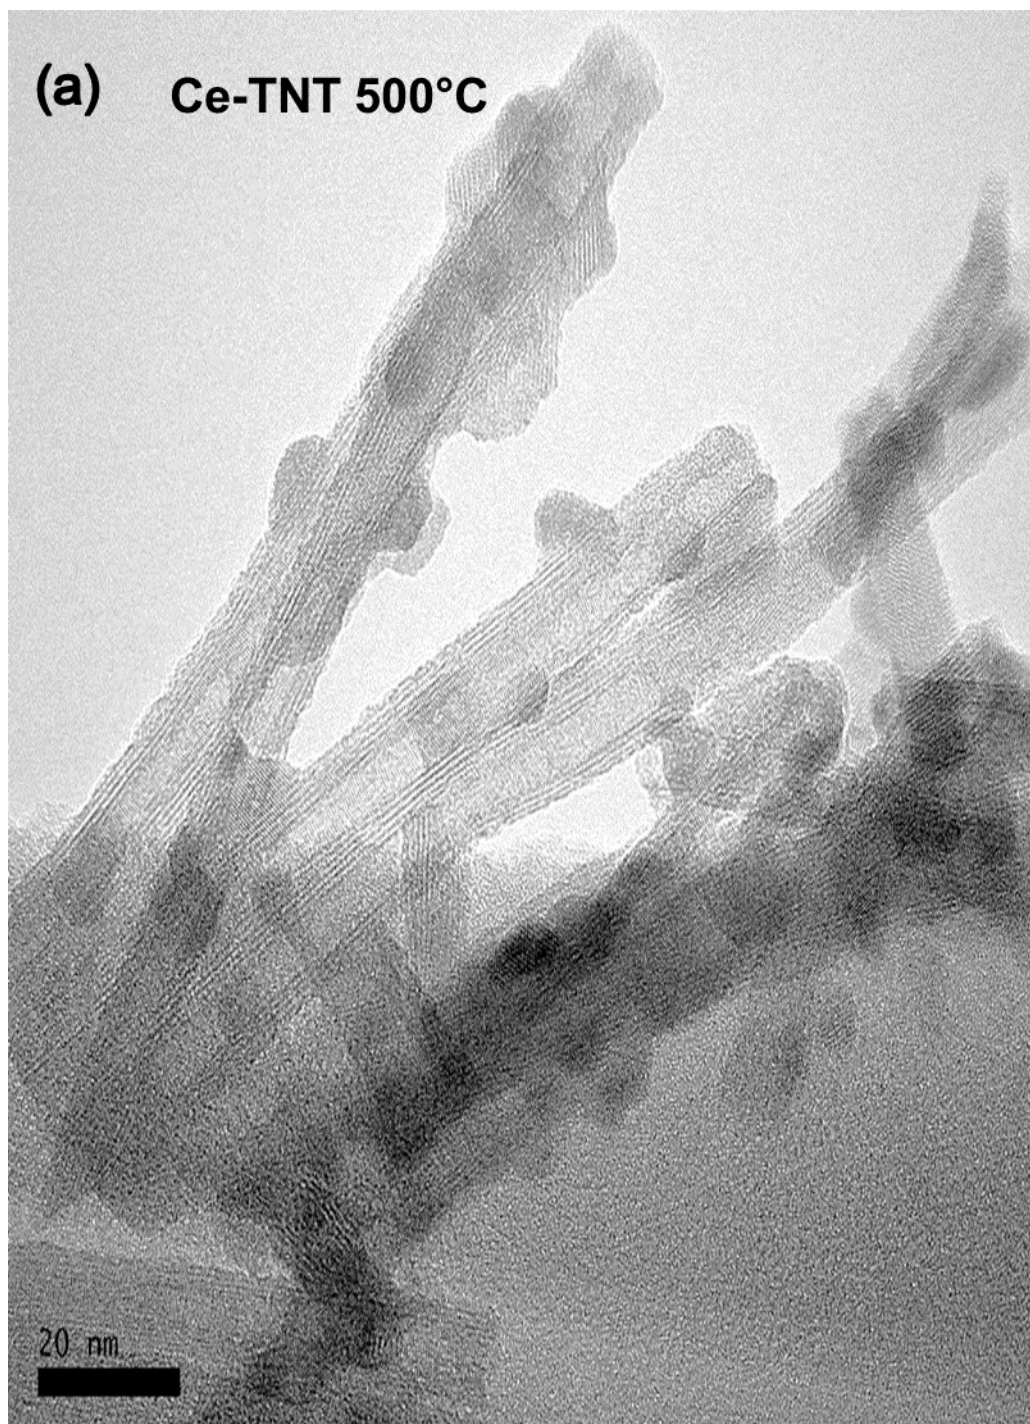

TEM Image of Ce-TNTs, 760 °C shown in Figure 2c

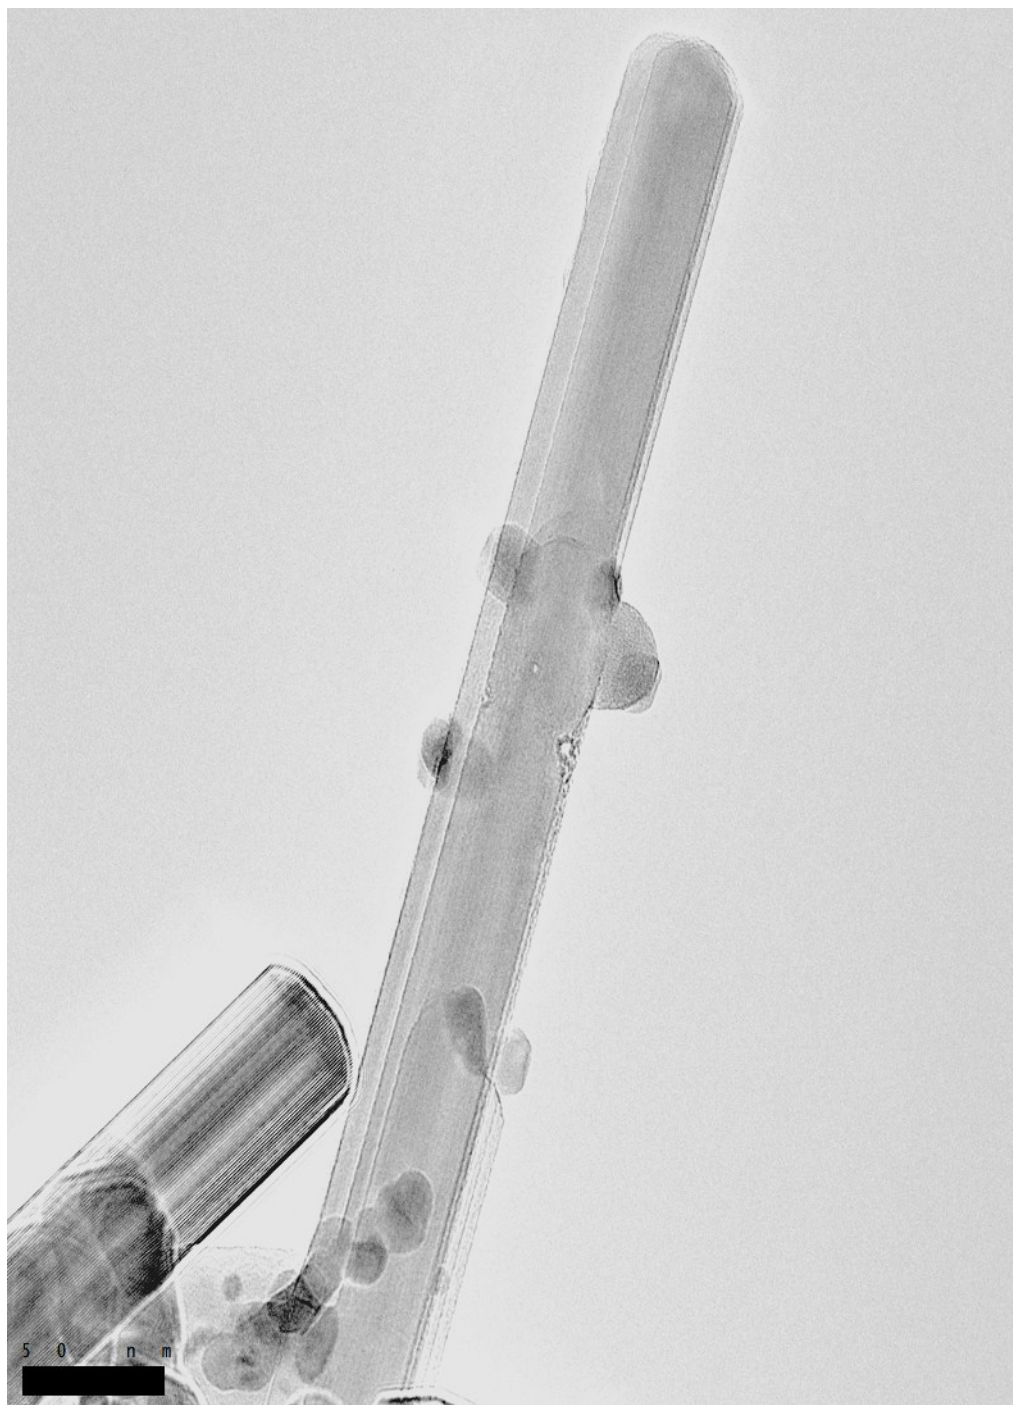

TEM Images of Ce-TNTs showing the surface attachment of CeO<sub>2</sub> on the TNTs.

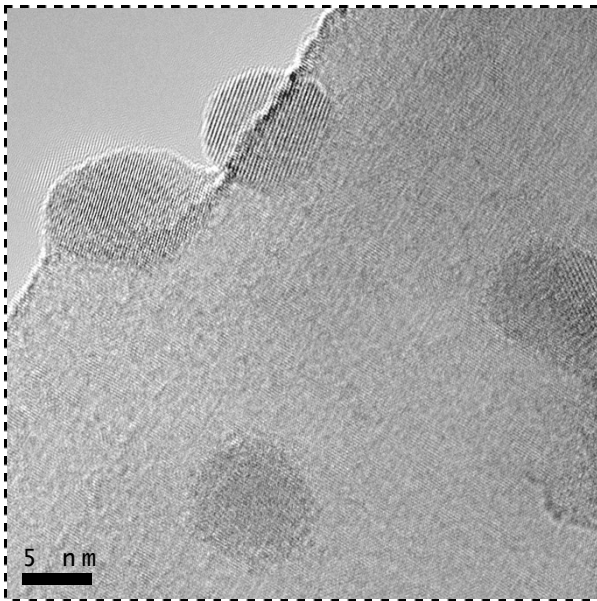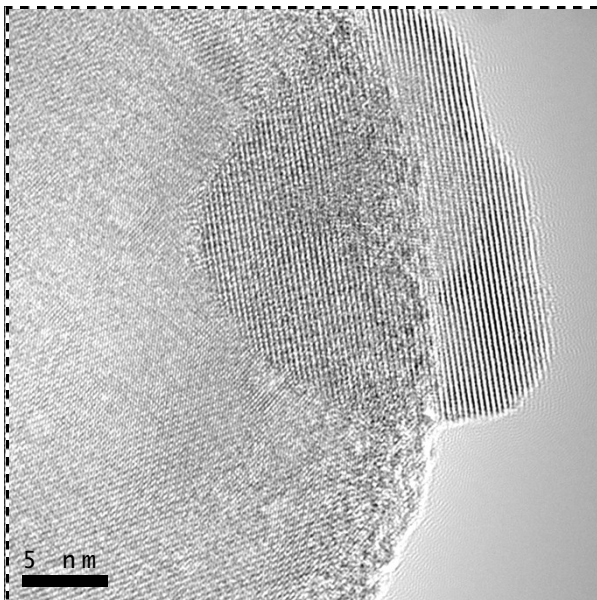

Supplement: c6ra24283a1.pdf [file c6ra24283a1.pdf]
